# Supplementary material for: Signatures of photo-aging and intrinsic aging in skin were revealed by transcriptome network analysis
Source: Aging (Albany NY). 2018 Jul 18;10(7):1609–26. doi: 10.18632/aging.101496 (PMC6075446; doi:10.18632/aging.101496)
Supplement: Supplemental Table 1 [file aging-10-101496-s005.xlsx]

## Sheet: Supplemental Table 1
Supplemental Table 1. Top10 most correlated genes in each significant module constructed from all skin samples.
Module Color	Gene Symbol	Gene Name	GS.UV	p.GS.UV	MM.ModuleColor	p.MM.ModuleColor
tan	TMA7	Translation Machinery Associated 7 Homolog	-0.328823	5.15e-16	0.901605	1.97e-211
	RPL31	Ribosomal Protein L31	-0.282352	4.89e-12	0.897237	2.7e-206
	RPS27A	Ribosomal Protein S27a	-0.235463	1.04e-08	0.879701	8.99e-188
	RPL35A	Ribosomal Protein L35a	-0.256506	4.03e-10	0.876134	2.33e-184
	RPL23	Ribosomal Protein L23	-0.359798	4.48e-19	0.874914	3.23e-183
	RPS25	Ribosomal Protein S25	-0.327003	7.6e-16	0.87379	3.57e-182
	RPS8	Ribosomal Protein S8	-0.321953	2.21e-15	0.870239	6.05e-179
	RPL24	Ribosomal Protein L24	-0.186814	6.26e-06	0.863552	4.09e-173
	RPS6	Ribosomal Protein S6	-0.290058	1.2e-12	0.862435	3.59e-172
	RPS24	Ribosomal Protein S24	-0.339511	4.94e-17	0.859956	4.17e-170
magenta	ELMOD1	ELMO Domain Containing 1	0.253922	6.1e-10	0.91853	6.68e-234
	XKRX	XK Related, X-Linked	0.208746	4.21e-07	0.904373	8.15e-215
	FLG2	Filaggrin Family Member 2	0.217305	1.35e-07	0.904313	9.68e-215
	SPAG1	Sperm Associated Antigen 1	0.17938	1.46e-05	0.902589	1.27e-212
	GSDMA	Gasdermin A	0.2324	1.62e-08	0.896079	5.69e-205
	SLC46A2	Solute Carrier Family 46 Member 2	0.163759	7.76e-05	0.887743	6.97e-196
	IDE	Insulin Degrading Enzyme	0.228664	2.78e-08	0.883355	2.2e-191
	ASPRV1	Aspartic Peptidase Retroviral Like 1	0.264016	1.17e-10	0.883009	4.9e-191
	KPRP	Keratinocyte Proline Rich Protein	0.383836	1.08e-21	0.882886	6.5e-191
	ESYT3	Extended Synaptotagmin 3	0.347952	7.28e-18	0.879798	7.23e-188
blue	CNRIP1	Cannabinoid Receptor Interacting Protein 1	0.248591	1.42e-09	0.93598	7.08e-263
	FERMT2	Fermitin Family Member 2	0.2595	2.47e-10	0.916476	6.32e-231
	ANXA6	Annexin A6	0.265776	8.74e-11	0.914633	2.55e-228
	CDH5	Cadherin 5	0.30458	7.5e-14	0.91199	1.1e-224
	RBMS3	RNA Binding Motif Single Stranded Interacting Protein 3	0.237117	8.13e-09	0.907817	3.59e-219
	PKN1	Protein Kinase N1	0.255678	4.6e-10	0.906433	2.12e-217
	DENND5A	DENN Domain Containing 5A	0.250538	1.04e-09	0.902052	5.67e-212
	STARD8	StAR Related Lipid Transfer Domain Containing 8	0.192023	3.39e-06	0.898975	2.61e-208
	PEAR1	Platelet Endothelial Aggregation Receptor 1	0.214006	2.11e-07	0.896255	3.59e-205
	PLCL2	Phospholipase C Like 2	0.232014	1.72e-08	0.894895	1.24e-203
grey60	FADS2	Fatty Acid Desaturase 2	-0.131974	0.00148727	0.937133	4.52e-265
	FAR2	Fatty Acyl-CoA Reductase 2	-0.158756	0.000128405	0.926015	1.88e-245
	ELOVL3	ELOVL Fatty Acid Elongase 3	-0.197854	1.67e-06	0.920748	3.32e-237
	FADS1	Fatty Acid Desaturase 1	-0.140885	0.000689347	0.92057	6.15e-237
	GLDC	Glycine Decarboxylase	-0.249397	1.25e-09	0.913141	2.97e-226
	AADACL3	Arylacetamide Deacetylase Like 3	-0.190219	4.2e-06	0.912448	2.63e-225
	HAO2	Hydroxyacid Oxidase 2	-0.211158	3.07e-07	0.904939	1.61e-215
	DGAT2L6	Diacylglycerol O-Acyltransferase 2 Like 6	-0.188825	4.95e-06	0.903518	9.27e-214
	GAL	Galanin And GMAP Prepropeptide	-0.196678	1.93e-06	0.899454	7.14e-209
	AWAT2	Acyl-CoA Wax Alcohol Acyltransferase 2	-0.18412	8.54e-06	0.897499	1.35e-206
greenyellow	RHOT2	Ras Homolog Family Member T2	-0.191539	3.59e-06	0.874277	1.26e-182
	HSF4	Heat Shock Transcription Factor 4	-0.321052	2.67e-15	0.86725	2.67e-176
	FAM193B	Family With Sequence Similarity 193 Member B	-0.101272	0.0149487	0.86233	4.4e-172
	CCNL2	Cyclin L2	-0.350142	4.38e-18	0.861001	5.69e-171
	MST1	Macrophage Stimulating 1	-0.176662	1.97e-05	0.849643	6.36e-162
	CDK5RAP3	CDK5 Regulatory Subunit Associated Protein 3	-0.189226	4.72e-06	0.840751	2.4e-155
	MAPK8IP3	Mitogen-Activated Protein Kinase 8 Interacting Protein 3	-0.0968666	0.0199523	0.840127	6.71e-155
	AC018766.5		-0.0518049	0.21404	0.839096	3.63e-154
	CDK3	Cyclin Dependent Kinase 3	-0.245154	2.41e-09	0.834016	1.25e-150
	QTRT1	Queuine TRNA-Ribosyltransferase Catalytic Subunit 1	-0.192409	3.23e-06	0.827417	3.3e-146
yellow	SHANK2	SH3 And Multiple Ankyrin Repeat Domains 2	0.168619	4.69e-05	0.948166	1.83e-288
	ATP6V0A4	ATPase H+ Transporting V0 Subunit A4	0.124115	0.00282261	0.94527	7.38e-282
	KIAA1324	Estrogen-Induced Gene 121 Protein	0.181547	1.14e-05	0.942931	8.8e-277
	CHRM3	Cholinergic Receptor Muscarinic 3	0.151748	0.000253777	0.942436	9.77e-276
	TMPRSS2	Transmembrane Protease, Serine 2	0.172868	2.98e-05	0.940063	7.64e-271
	PDE9A	Phosphodiesterase 9A	0.112074	0.00704399	0.939395	1.68e-269
	EFCAB4B	Calcium Release Activated Channel Regulator 2A	0.161837	9.43e-05	0.931622	6.22e-255
	KRT18	Keratin 18	0.149634	0.000309934	0.931159	4.05e-254
	RHPN2	Rhophilin Rho GTPase Binding Protein 2	0.171821	3.34e-05	0.93075	2.09e-253
	PIP5K1B	Phosphatidylinositol-4-Phosphate 5-Kinase Type 1 Beta	0.184404	8.26e-06	0.930372	9.44e-253
purple	CXCL12	C-X-C Motif Chemokine Ligand 12	0.10022	0.0160312	0.907933	2.54e-219
	OLFML1	Olfactomedin Like 1	0.125084	0.00261308	0.905979	7.96e-217
	GALNT16	Polypeptide N-Acetylgalactosaminyltransferase 16	0.149059	0.000327098	0.903137	2.72e-213
	GPR124	Adhesion G Protein-Coupled Receptor A2	0.0911257	0.028617	0.895573	2.13e-204
	ITIH5	Inter-Alpha-Trypsin Inhibitor Heavy Chain Family Member 5	0.243378	3.17e-09	0.893045	1.41e-201
	GLT8D2	Glycosyltransferase 8 Domain Containing 2	-0.0875049	0.0356047	0.885268	2.53e-193
	COL6A1	Collagen Type VI Alpha 1 Chain	0.175151	2.33e-05	0.883231	2.93e-191
	EPB41L2	Erythrocyte Membrane Protein Band 4.1 Like 2	0.168232	4.88e-05	0.873898	2.83e-182
	LAMA4	Laminin Subunit Alpha 4	0.119752	0.00396808	0.873791	3.56e-182
	ACE	Angiotensin I Converting Enzyme	0.1295	0.00182649	0.872662	3.87e-181
brown	MOB4	MOB Family Member 4, Phocein	-0.102167	0.0140787	0.909407	3.06e-221
	TCEA1	Transcription Elongation Factor A1	-0.0358119	0.390538	0.907894	2.85e-219
	UBE2V2	Ubiquitin Conjugating Enzyme E2 V2	-0.18478	7.92e-06	0.895426	3.12e-204
	LAMTOR3	Late Endosomal/Lysosomal Adaptor, MAPK And MTOR Activator 3	-0.1942	2.61e-06	0.892667	3.67e-201
	RAB18	RAB18, Member RAS Oncogene Family	-0.00820403	0.844106	0.885373	1.98e-193
	ARMC1	Armadillo Repeat Containing 1	-0.103299	0.0130433	0.882955	5.54e-191
	EXOC5	Exocyst Complex Component 5	-0.0667471	0.109237	0.881405	1.93e-189
	TVP23B	Trans-Golgi Network Vesicle Protein 23 Homolog B	-0.126738	0.00228791	0.878932	4.99e-187
	MZT1	Mitotic Spindle Organizing Protein 1	-0.223092	6.11e-08	0.876796	5.5e-185
	TWF1	Twinfilin Actin Binding Protein 1	-0.0801622	0.0542939	0.874612	6.18e-183
aGS indicates gene significance which denotes correlation between each gene and UV exposure.
bp. denotes Pearson’s correlation coefficient p-values.
cMM denotes the high intra-module connectivity in each module
