# Supplementary material for: Signatures of photo-aging and intrinsic aging in skin were revealed by transcriptome network analysis
Source: Aging (Albany NY). 2018 Jul 18;10(7):1609–26. doi: 10.18632/aging.101496 (PMC6075446; doi:10.18632/aging.101496)
Supplement: Supplemental Table 2 [file aging-10-101496-s006.xlsx]

## Sheet: Supplemental Table 2
Supplemental Table 2. Top10 most correlated genes in each significant module constructed from lower leg skin samples
Module Color	Gene Symbol	Gene Name	GS.Age	p.GS.Age	MM.ModuleColor	p.MM.ModuleColor
tan	GPR107	G Protein-Coupled Receptor 107	-0.319496	1.01e-09	0.903694	7.06e-130
	WASF2	WAS Protein Family Member 2	-0.272413	2.35e-07	0.889955	2.28e-120
	AC092171.4	ENSG00000272953	-0.212689	6.2e-05	0.884467	6.44e-117
	NDST1	N-Deacetylase And N-Sulfotransferase 1	-0.29048	3.26e-08	0.883881	1.47e-116
	DNAJC5	DnaJ Heat Shock Protein Family (Hsp40) Member C5	-0.300856	9.83e-09	0.875224	1.75e-111
	IP6K1	Inositol Hexakisphosphate Kinase 1	-0.234388	9.65e-06	0.869452	2.63e-108
	RXRA	Retinoid X Receptor Alpha	-0.189929	0.000359772	0.865289	4.17e-106
	C22orf23	Chromosome 22 Open Reading Frame 23	-0.193114	0.00028458	0.860659	9.58e-104
	KLF13	Kruppel Like Factor 13	-0.177792	0.000849523	0.859512	3.57e-103
	HIF1AN	Hypoxia Inducible Factor 1 Alpha Subunit Inhibitor	-0.277158	1.42e-07	0.857472	3.61e-102
purple	XKRX	XK Related, X-Linked	-0.196233	0.000225391	0.942921	8.96e-168
	GSDMA	Gasdermin A	-0.194417	0.000258287	0.941904	1.76e-166
	RAB11FIP1	RAB11 Family Interacting Protein 1	-0.166419	0.00181099	0.929443	2.55e-152
	TMPRSS13	Transmembrane Protease, Serine 13	-0.205039	0.000114427	0.920088	2.67e-143
	ASPRV1	Aspartic Peptidase Retroviral Like 1	-0.170791	0.00136121	0.919387	1.14e-142
	TMEM86A	Transmembrane Protein 86A	-0.162728	0.00229256	0.90675	3.46e-132
	KLHL18	Kelch Like Family Member 18	-0.211492	6.84e-05	0.905802	1.83e-131
	SLC46A2	Solute Carrier Family 46 Member 2	-0.153798	0.00397643	0.903191	1.67e-129
	KPRP	Keratinocyte Proline Rich Protein	-0.131956	0.0136217	0.901078	5.84e-128
	CSNK2A2	Casein Kinase 2 Alpha 2	-0.18386	0.000556563	0.892989	2.35e-122
magenta	CXCL12	C-X-C Motif Chemokine Ligand 12	0.155122	0.00367097	0.903082	2.01e-129
	GALNT16	Polypeptide N-Acetylgalactosaminyltransferase 16	0.226056	2.01e-05	0.899945	3.8e-127
	COL5A1	Collagen Type V Alpha 1 Chain	0.209626	7.95e-05	0.893381	1.29e-122
	THY1	Thy-1 Cell Surface Antigen	0.135004	0.0115831	0.886711	2.63e-118
	GPR124	Adhesion G Protein-Coupled Receptor A2	0.180571	0.000701135	0.883853	1.53e-116
	COL1A2	Collagen Type I Alpha 2 Chain	0.151485	0.00456533	0.88285	6.21e-116
	LOXL1	Lysyl Oxidase Like 1	0.208756	8.52e-05	0.879329	7.66e-114
	COL6A1	Collagen Type VI Alpha 1 Chain	0.222221	2.8e-05	0.878806	1.55e-113
	OLFML1	Olfactomedin Like 1	0.23015	1.41e-05	0.876796	2.24e-112
	COL15A1	Collagen Type XV Alpha 1 Chain	0.177592	0.000861265	0.873097	2.7e-110
cyan	KRTAP17-1	Keratin Associated Protein 17-1	-0.177446	0.000869912	0.974539	2.12e-227
	KRT33B	Keratin 33B	-0.161237	0.0025182	0.973545	1.49e-224
	KRTAP2-2	Keratin Associated Protein 2-2	-0.176928	0.000901287	0.96828	4.48e-211
	KRT86	Keratin 86	-0.133585	0.0124958	0.968171	8.02e-211
	KRTAP1-1	Keratin Associated Protein 1-1	-0.167877	0.00164779	0.967558	2.09e-209
	KRTAP3-3	Keratin Associated Protein 3-3	-0.178446	0.000812206	0.966887	6.86e-208
	KRTAP2-1	Keratin Associated Protein 2-1	-0.158281	0.00302643	0.964075	7.43e-202
	KRTAP1-3	Keratin Associated Protein 1-3	-0.184923	0.000516134	0.963711	4.14e-201
	KRT33A	Keratin 33A	-0.159008	0.00289343	0.962179	4.73e-198
	KRTAP3-1	Keratin Associated Protein 3-1	-0.177936	0.000841195	0.961874	1.85e-197
aGS indicates gene significance which denotes correlation between each gene and Age.
bp. denotes Pearson’s correlation coefficient p-values.
cMM denotes the high intra-module connectivity in each module
