# Supplementary material for: Signatures of photo-aging and intrinsic aging in skin were revealed by transcriptome network analysis
Source: Aging (Albany NY). 2018 Jul 18;10(7):1609–26. doi: 10.18632/aging.101496 (PMC6075446; doi:10.18632/aging.101496)
Supplement: Supplemental Table 3 [file aging-10-101496-s007.xlsx]

## Sheet: Supplemental Table 3
Supplemental Table 3. Up-regulated collagen genes upon UV exposure
Gene	Module Color	GS.Age	p.GS.Age
COL12A1	blue	0.387842	3.76e-22
COL4A2	blue	0.323758	1.51e-15
COL8A1	blue	0.271132	3.52e-11
COL4A1	blue	0.235009	1.11e-08
COL8A2	purple	0.216806	1.45e-07
COL6A2	blue	0.196426	1.99e-06
COL6A1	purple	0.175151	2.33e-05
COLEC12	blue	0.168288	4.85e-05
COL3A1	purple	0.149993	0.000299642
COL5A2	purple	0.123904	0.00287007
COL28A1	yellow	-0.111667	0.00725488
COL6A3	blue	0.105919	0.0108993
COL9A2	yellow	-0.103236	0.0130989
COL1A2	purple	0.102205	0.0140435
COL1A1	purple	0.0873118	0.0360149
COL15A1	purple	0.084743	0.0418666
COL6A6	purple	-0.0798711	0.0551777
COL5A1	purple	0.0749575	0.0719921
COL13A1	purple	0.0732623	0.0786848
COL14A1	purple	-0.0181113	0.664186
