# Supplementary material for: Signatures of photo-aging and intrinsic aging in skin were revealed by transcriptome network analysis
Source: Aging (Albany NY). 2018 Jul 18;10(7):1609–26. doi: 10.18632/aging.101496 (PMC6075446; doi:10.18632/aging.101496)
Supplement: Supplemental Table 4 [file aging-10-101496-s008.xlsx]

## Sheet: Supplemental Table 4
Supplemental Table 4. Collagen genes from magenta module constructed from lower leg
	Lower leg			Suprapubic
Gene	Module Color	GS.Age	p.GS.Age	Module Color	GS.Age	p.GS.Age
COL6A1	magenta	0.222221	2.8e-05	darkred	-0.0710229	0.285576
COL13A1	magenta	0.221344	3.02e-05	grey	0.00242678	0.97093
COL5A1	magenta	0.209626	7.95e-05	darkred	-0.0605094	0.363095
COL16A1	magenta	0.207834	9.17e-05	grey	0.0907221	0.172203
COL15A1	magenta	0.177592	0.000861265	darkred	0.0239323	0.719269
COL1A1	magenta	0.164411	0.00206011	darkred	-0.079586	0.2313
COL1A2	magenta	0.151485	0.00456533	darkred	-0.123391	0.0628813
COL18A1	magenta	0.149273	0.00520109	grey	-0.0875569	0.187723
COL8A2	magenta	0.130367	0.0148042	darkred	-0.109466	0.0991955
COL3A1	magenta	0.124813	0.019676	darkred	-0.0995266	0.13406
COL6A5	magenta	0.0493484	0.358013	grey	-0.0442998	0.505691
COL6A6	magenta	0.0191258	0.721803	darkred	-0.022662	0.733591
