# Supplementary material for: Signatures of photo-aging and intrinsic aging in skin were revealed by transcriptome network analysis
Source: Aging (Albany NY). 2018 Jul 18;10(7):1609–26. doi: 10.18632/aging.101496 (PMC6075446; doi:10.18632/aging.101496)
Supplement: Supplemental Table 5 [file aging-10-101496-s009.xlsx]

## Sheet: Supplemental Table 5
Supplemental Table 5. Keratin genes from cyan module constructed from lower leg
	Lower leg			Suprapubic
Gene	Module Color	GS.Age	p.GS.Age	Module Color	GS.Age	p.GS.Age
KRT82	cyan	-0.20609	0.000105329	tan	-0.109692	0.0984927
KRT25	cyan	-0.196602	0.000219214	tan	-0.0787594	0.236197
KRT28	cyan	-0.196501	0.000220889	tan	-0.0922618	0.165007
KRT85	cyan	-0.195557	0.000237159	tan	-0.113109	0.0883822
KRTAP10-2	cyan	-0.186233	0.000470033	tan	-0.0407546	0.540371
KRTAP3-2	cyan	-0.186202	0.000471055	tan	-0.112235	0.0908849
KRTAP1-3	cyan	-0.184923	0.000516134	tan	-0.104133	0.116883
KRTAP4-5	cyan	-0.183095	0.000587475	tan	-0.0623404	0.348729
KRTAP12-1	cyan	-0.182894	0.000595878	tan	-0.0507905	0.445346
KRT27	cyan	-0.182291	0.000621677	tan	-0.0904582	0.173459
KRTAP4-7	cyan	-0.180783	0.000690837	tan	-0.0673177	0.311521
KRT35	cyan	-0.179122	0.00077519	tan	-0.106301	0.109417
KRTAP3-3	cyan	-0.178446	0.000812206	tan	-0.113252	0.0879774
KRTAP3-1	cyan	-0.177936	0.000841195	tan	-0.0808784	0.223787
KRT71	cyan	-0.177868	0.000845132	tan	-0.0782315	0.239363
KRTAP17-1	cyan	-0.177446	0.000869912	tan	-0.0911378	0.170237
KRTAP10-12	cyan	-0.177053	0.000893604	tan	-0.0521155	0.433549
KRTAP2-2	cyan	-0.176928	0.000901287	tan	-0.080463	0.226183
KRT75	cyan	-0.176807	0.000908742	tan	-0.0646878	0.330845
KRTAP4-11	cyan	-0.176713	0.000914597	tan	-0.055294	0.405992
KRTAP4-9	cyan	-0.176403	0.000934145	tan	-0.0880908	0.185036
KRT26	cyan	-0.175739	0.000977253	tan	-0.0588037	0.376803
KRTAP12-2	cyan	-0.175429	0.000998009	tan	-0.0435092	0.513322
KRTAP10-3	cyan	-0.175333	0.00100455	tan	-0.0514261	0.439664
KRTAP11-1	cyan	-0.17466	0.00105129	tan	-0.131069	0.0480684
KRTAP10-5	cyan	-0.173997	0.0010993	tan	-0.0623696	0.348503
KRTAP10-11	cyan	-0.172988	0.0011762	tan	-0.0463288	0.486379
KRTAP4-12	cyan	-0.172801	0.00119104	tan	-0.0697572	0.29427
KRTAP4-2	cyan	-0.171055	0.00133761	tan	-0.0735996	0.268414
KRTAP16-1	cyan	-0.170466	0.00139076	tan	-0.0708171	0.286977
KRTAP9-9	cyan	-0.170067	0.00142775	tan	-0.0786285	0.236979
KRTAP26-1	cyan	-0.170024	0.00143184	tan	-0.0824224	0.215042
KRTAP2-4	cyan	-0.169697	0.00146296	tan	-0.084978	0.201108
KRTAP4-6	cyan	-0.169516	0.00148046	tan	-0.0848117	0.201994
KRTAP19-1	cyan	-0.169382	0.00149354	tan	-0.0835401	0.208865
KRTAP9-3	cyan	-0.169322	0.00149942	tan	-0.0738907	0.26652
KRTAP4-3	cyan	-0.169262	0.00150533	tan	-0.0643226	0.333588
KRTAP10-10	cyan	-0.168626	0.00156928	tan	-0.059947	0.36758
KRTAP4-8	cyan	-0.168409	0.00159166	tan	-0.0580889	0.382641
KRTAP1-1	cyan	-0.167877	0.00164779	tan	-0.078066	0.240361
KRT34	cyan	-0.16733	0.00170738	tan	-0.0981083	0.139722
KRTAP10-9	cyan	-0.167188	0.00172321	tan	-0.0500775	0.451768
KRTAP4-1	cyan	-0.166382	0.00181533	tan	-0.0933863	0.159895
KRTAP10-1	cyan	-0.165877	0.00187544	tan	-0.0587929	0.376891
KRTAP19-5	cyan	-0.165741	0.0018919	tan	-0.0827889	0.213002
KRTAP4-4	cyan	-0.165679	0.00189941	tan	-0.0766938	0.248752
KRTAP9-8	cyan	-0.165167	0.00196282	tan	-0.0832016	0.210722
KRTAP9-2	cyan	-0.16275	0.00228937	tan	-0.06746	0.310497
KRTAP9-4	cyan	-0.162186	0.00237231	tan	-0.0702988	0.290529
KRT33B	cyan	-0.161237	0.0025182	tan	-0.0833333	0.209998
KRTAP1-5	cyan	-0.159432	0.00281836	tan	-0.0892167	0.179461
KRT33A	cyan	-0.159008	0.00289343	tan	-0.0751924	0.258164
KRTAP2-1	cyan	-0.158281	0.00302643	tan	-0.0795023	0.231792
KRTAP2-3	cyan	-0.155992	0.00348219	tan	-0.0815429	0.219993
KRTAP19-3	cyan	-0.150619	0.00480523	tan	-0.0670555	0.313413
KRT83	cyan	-0.150006	0.00498204	tan	-0.0822873	0.215797
KRTAP8-1	cyan	-0.143249	0.00735446	tan	-0.0831314	0.211109
KRT39	cyan	-0.141578	0.00807884	tan	-0.0709151	0.28631
KRTAP13-1	cyan	-0.137378	0.010187	tan	-0.0880809	0.185085
KRT86	cyan	-0.133585	0.0124958	tan	-0.0823359	0.215525
KRT74	cyan	-0.131321	0.0140836	tan	-0.0808974	0.223678
KRTAP13-2	cyan	-0.126501	0.0180657	tan	-0.090531	0.173112
KRT32	cyan	-0.123799	0.0207029	tan	-0.0763713	0.250753
KRT38	cyan	-0.12036	0.0245366	tan	-0.0496215	0.455903
KRT81	cyan	-0.113801	0.0335649	tan	-0.0917089	0.167564
KRT31	cyan	-0.0627892	0.242023	tan	-0.0562225	0.398142
