# Supplementary material for: Signatures of photo-aging and intrinsic aging in skin were revealed by transcriptome network analysis
Source: Aging (Albany NY). 2018 Jul 18;10(7):1609–26. doi: 10.18632/aging.101496 (PMC6075446; doi:10.18632/aging.101496)
Supplement: Supplemental Table 6 [file aging-10-101496-s010.xlsx]

## Sheet: Supplemental Table 6
Supplemental Table 6. Top10 most correlated genes in each significant module constructed from suprapubic skin samples
Module Color	Gene Symbol	Gene Name	GS.Age	p.GS.Age	MM.ModuleColor	p.MM.ModuleColor
red	AC092171.4	ENSG00000272953	-0.296243	5.33528e-06	0.935519	4.23507e-104
	PSKH1	Protein Serine Kinase H1	-0.288903	9.28181e-06	0.921705	6.42633e-95
	NF2	Neurofibromin 2	-0.303414	3.06002e-06	0.918092	8.54132e-93
	KLF13	Kruppel Like Factor 13	-0.288964	9.2395e-06	0.910535	1.18086e-88
	RBM15B	RNA Binding Motif Protein 15B	-0.323672	5.86538e-07	0.90734	5.16782e-87
	FAM53B	Family With Sequence Similarity 53 Member B	-0.291021	7.92385e-06	0.906607	1.20721e-86
	NDST1	N-Deacetylase And N-Sulfotransferase 1	-0.347168	7.38143e-08	0.901111	5.60503e-84
	IP6K1	Inositol Hexakisphosphate Kinase 1	-0.289131	9.12552e-06	0.893261	1.98773e-80
	DNAJC5	DnaJ Heat Shock Protein Family (Hsp40) Member C5	-0.333571	2.5013e-07	0.889751	6.25989e-79
	MON1B	MON1 Homolog B, Secretory Trafficking Associated	-0.293677	6.48575e-06	0.886327	1.62297e-77
black	AEBP2	AE Binding Protein 2	0.239779	0.000258052	0.917775	1.29604e-92
	GNAI1	G Protein Subunit Alpha I1	0.279194	1.88634e-05	0.894086	8.67449e-81
	BAG4	BCL2 Associated Athanogene 4	0.279505	1.84471e-05	0.88634	1.60277e-77
	AFTPH	Aftiphilin	0.238012	0.0002874	0.883317	2.60673e-76
	KDM4C	Lysine Demethylase 4C	0.247251	0.000162193	0.878559	1.80106e-74
	RNF111	Ring Finger Protein 111	0.257035	8.63812e-05	0.878375	2.11349e-74
	ZZZ3	Zinc Finger ZZ-Type Containing 3	0.263007	5.80757e-05	0.87812	2.63772e-74
	LNX2	Ligand Of Numb-Protein X 2	0.266583	4.55779e-05	0.876815	8.14106e-74
	TMEM68	Transmembrane Protein 68	0.296618	5.18406e-06	0.875511	2.4767e-73
	CAND1	Cullin Associated And Neddylation Dissociated 1	0.217002	0.000973624	0.866642	3.49043e-70
brown	TCEA1	Transcription Elongation Factor A1	0.228882	0.000495096	0.926074	1.25696e-97
	UBE2V2	Ubiquitin Conjugating Enzyme E2 V2	0.192488	0.00352428	0.920798	2.24025e-94
	LAMTOR3	Late Endosomal/Lysosomal Adaptor, MAPK And MTOR Activator 3	0.235602	0.000332447	0.898824	6.49694e-83
	MZT1	Mitotic Spindle Organizing Protein 1	0.251436	0.00012426	0.894043	9.06477e-81
	RAB18	RAB18, Member RAS Oncogene Family	0.204077	0.00195346	0.892122	6.16808e-80
	COPS2	COP9 Signalosome Subunit 2	0.171433	0.00949832	0.886235	1.768e-77
	TVP23B	Trans-Golgi Network Vesicle Protein 23 Homolog B	0.241043	0.00023879	0.882884	3.86226e-76
	PDCD10	Programmed Cell Death 10	0.207312	0.00164728	0.882584	5.06345e-76
	PPP4R2	Protein Phosphatase 4 Regulatory Subunit 2	0.162751	0.0138782	0.881975	8.76787e-76
	C11orf58	Chromosome 11 Open Reading Frame 58	0.19999	0.00241414	0.881524	1.31382e-75
aGS indicates gene significance which denotes correlation between each gene and Age.
bp. denotes Pearson’s correlation coefficient p-values.
cMM denotes the high intra-module connectivity in each module
